# Supplementary material for: Δ-Quantum machine-learning for medicinal chemistry
Source: Royal Society of Chemistry journal article supplement (doi:10.1039/d2cp00834c), 2022-01-01

Test set 1  
~88k conformers

Test set 2  
~88k conformers

Test set 3  
~88k conformers

Validation set  
~88k conformers

remainder of QMugs used as training set for  
multi-conformer model (~1.6M) in learning curve

Single-  
conformer  
nested  
training sets  
for learning  
curves

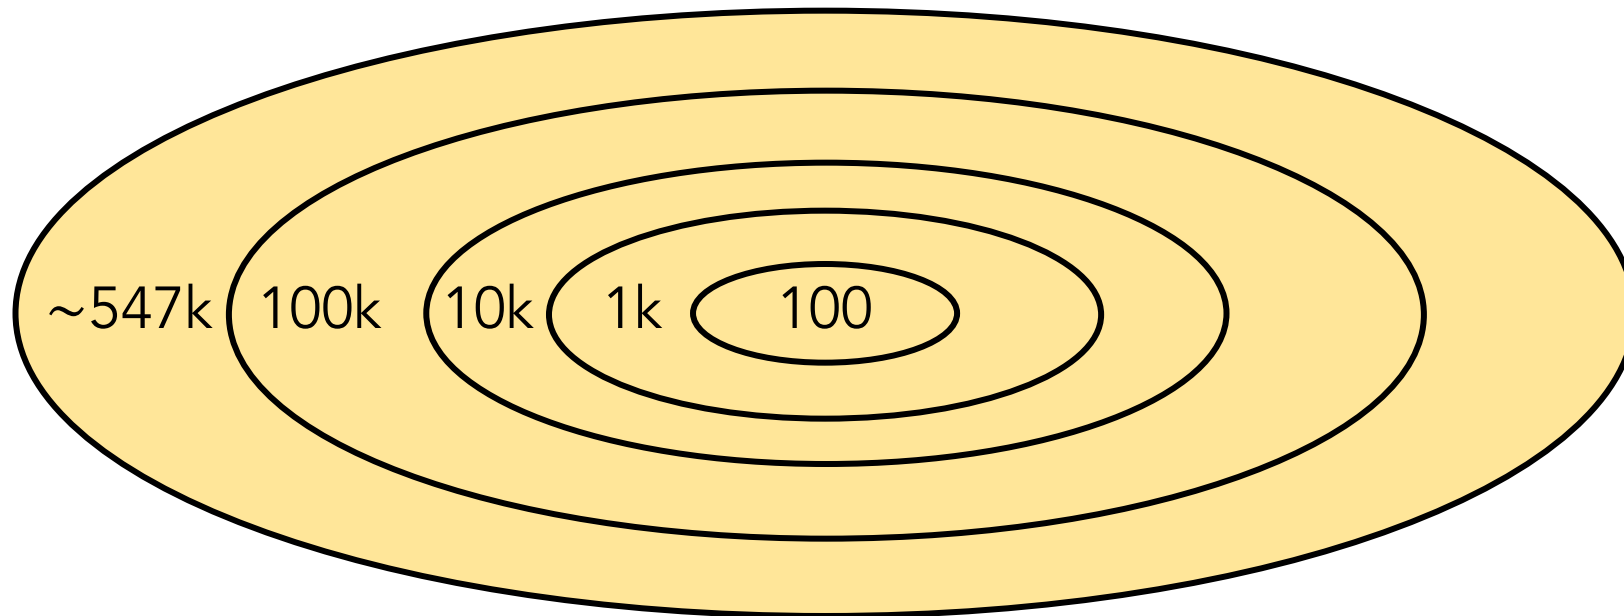

Supplement: d2cp00834c2.zip [file d2cp00834c2.zip]
