# Supplementary material for: Δ-Quantum machine-learning for medicinal chemistry
Source: Royal Society of Chemistry journal article supplement (doi:10.1039/d2cp00834c), 2022-01-01
Supplement: d2cp00834c2.zip [file d2cp00834c2.zip]

**A****PDB ID: 1BNA**

|          | $\omega$ B97X-D | ML     |
|----------|-----------------|--------|
| <b>a</b> | 0.0801          | 0.0060 |
| <b>b</b> | 0.1561          | 0.1343 |
| <b>c</b> | 0.1513          | 0.1082 |
| <b>d</b> | 0.1483          | 0.1396 |
| <b>e</b> | 0.0516          | 0.0053 |
| <b>f</b> | 0.2727          | 0.2057 |

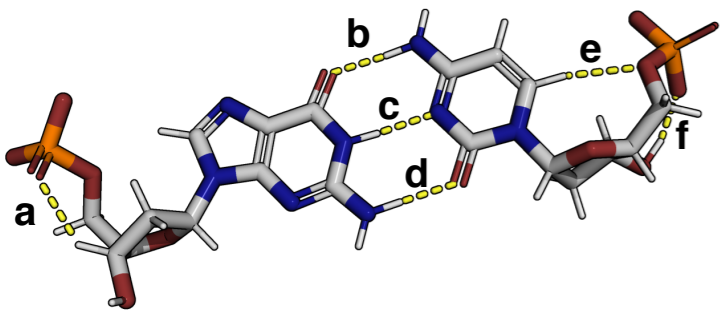**B****PDB ID: 3H0O**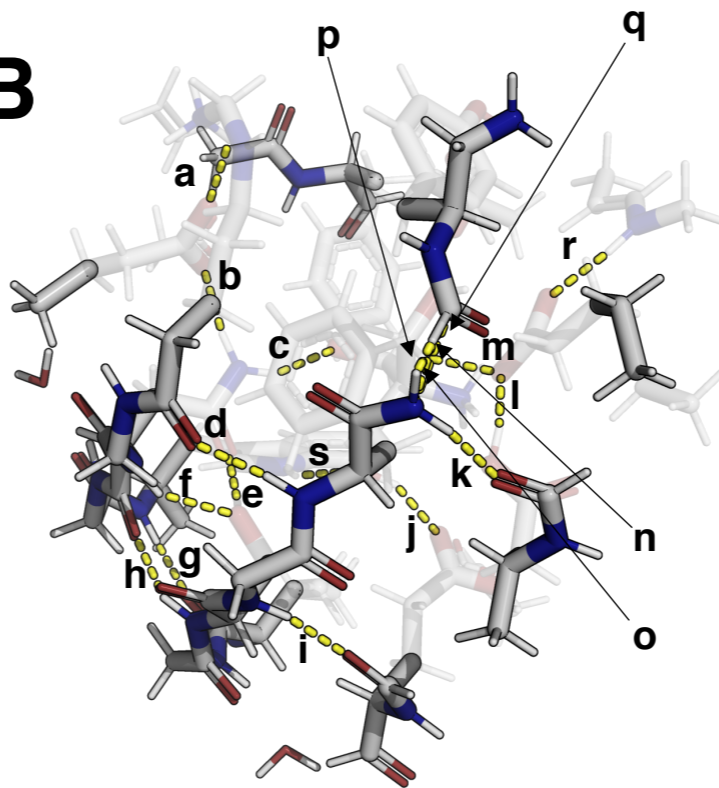

|          | $\omega$ B97X-D | ML     |
|----------|-----------------|--------|
| <b>a</b> | 0.0647          | 0.0705 |
| <b>b</b> | 0.1053          | 0.0987 |
| <b>c</b> | 0.1188          | 0.1154 |
| <b>d</b> | 0.1161          | 0.1141 |
| <b>e</b> | 0.1721          | 0.1693 |
| <b>f</b> | 0.0823          | 0.0725 |
| <b>g</b> | 0.1036          | 0.0908 |
| <b>h</b> | 0.0808          | 0.0765 |
| <b>i</b> | 0.0958          | 0.0888 |
| <b>j</b> | 0.1735          | 0.1632 |

|          | $\omega$ B97X-D | ML     |
|----------|-----------------|--------|
| <b>k</b> | 0.1365          | 0.1302 |
| <b>l</b> | 0.2937          | 0.2537 |
| <b>m</b> | 0.0524          | 0.0549 |
| <b>n</b> | 0.1326          | 0.0735 |
| <b>o</b> | 0.1768          | 0.2605 |
| <b>p</b> | 0.2472          | 0.7140 |
| <b>q</b> | 0.1078          | 0.1065 |
| <b>r</b> | 0.1169          | 0.1075 |
| <b>s</b> | 0.0625          | 0.0618 |
