# Supplementary figures and images for: Δ-Quantum machine-learning for medicinal chemistry
Source: Royal Society of Chemistry journal article supplement (doi:10.1039/d2cp00834c), 2022-01-01

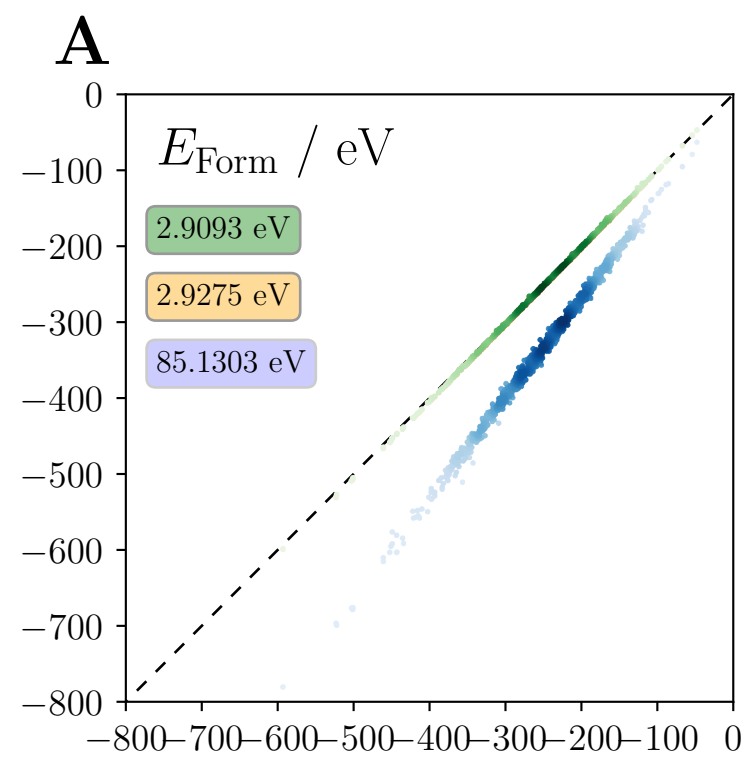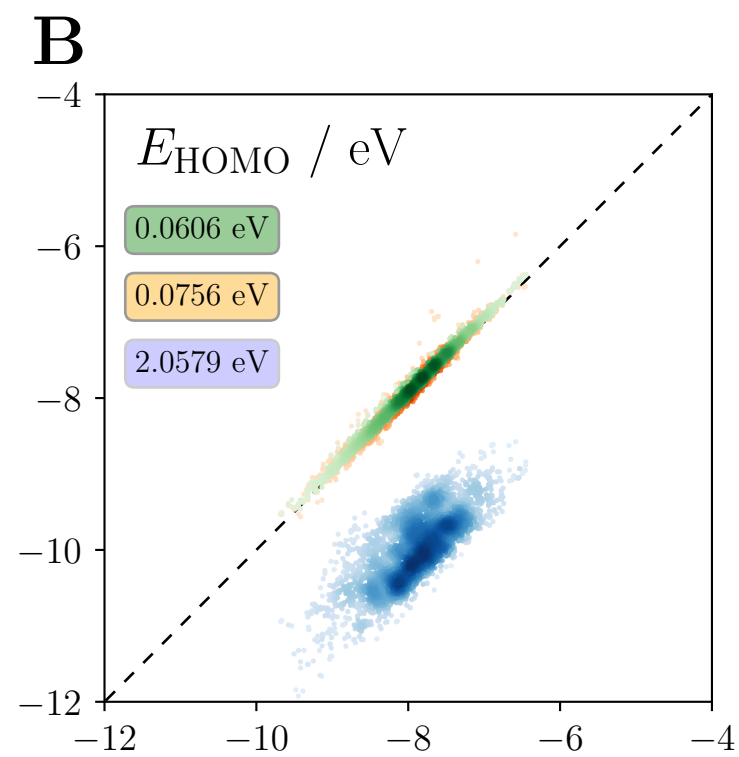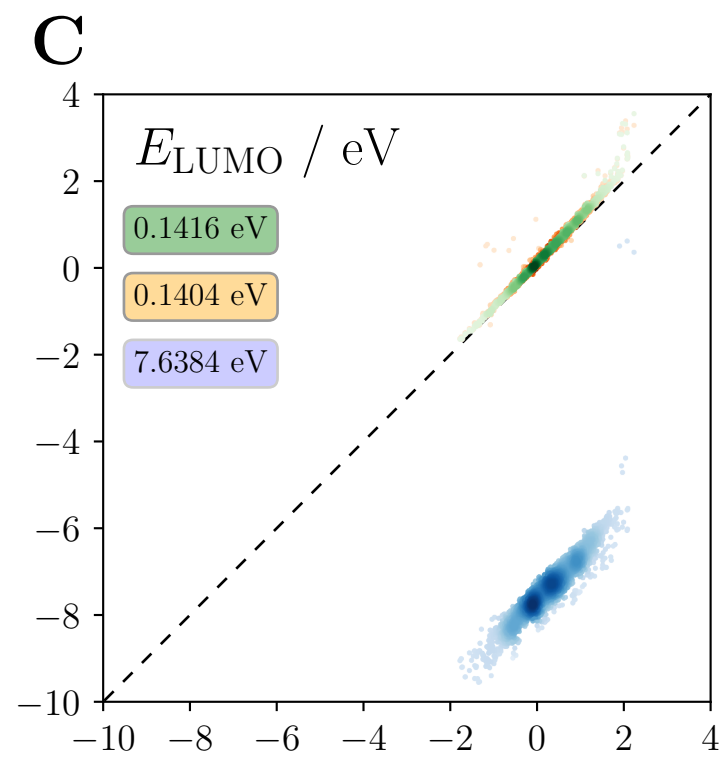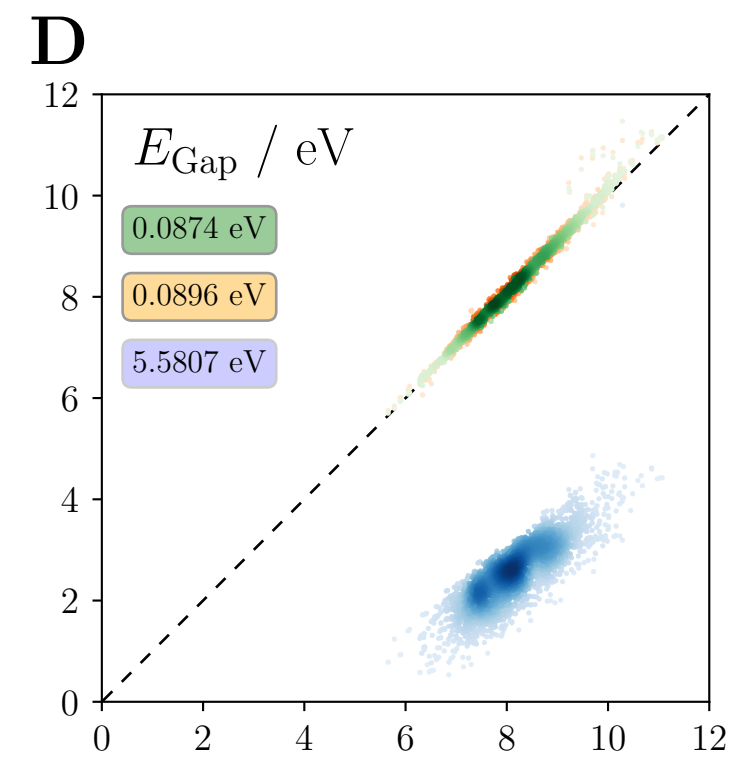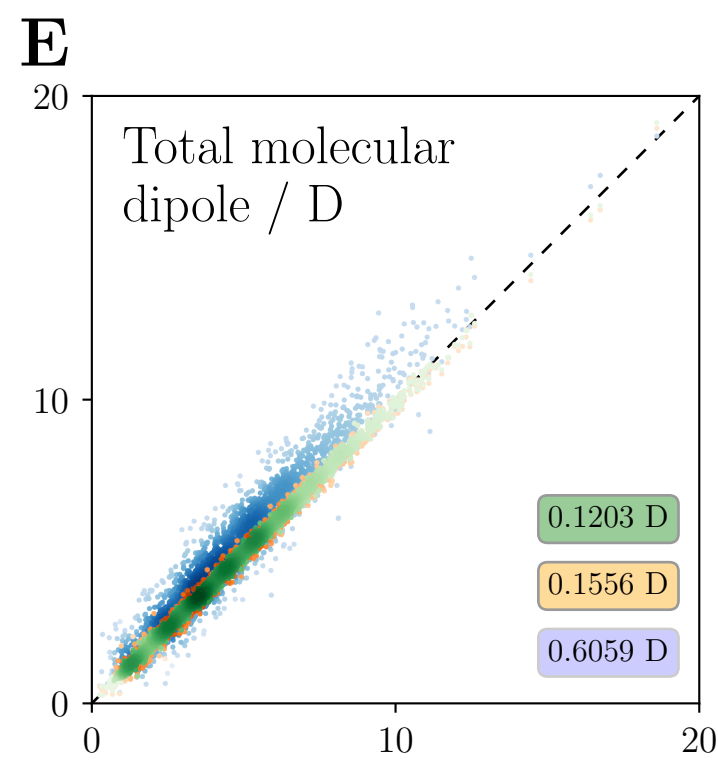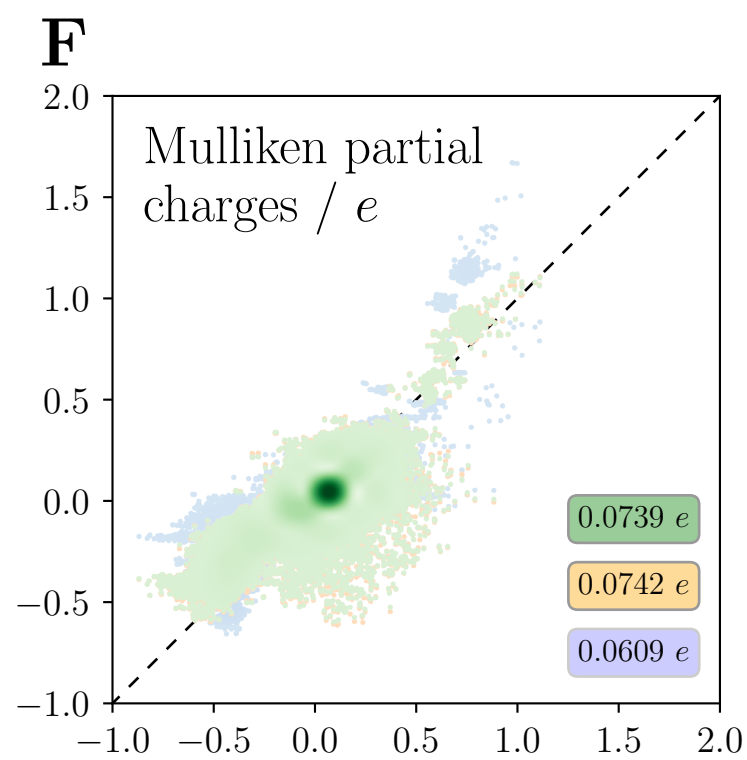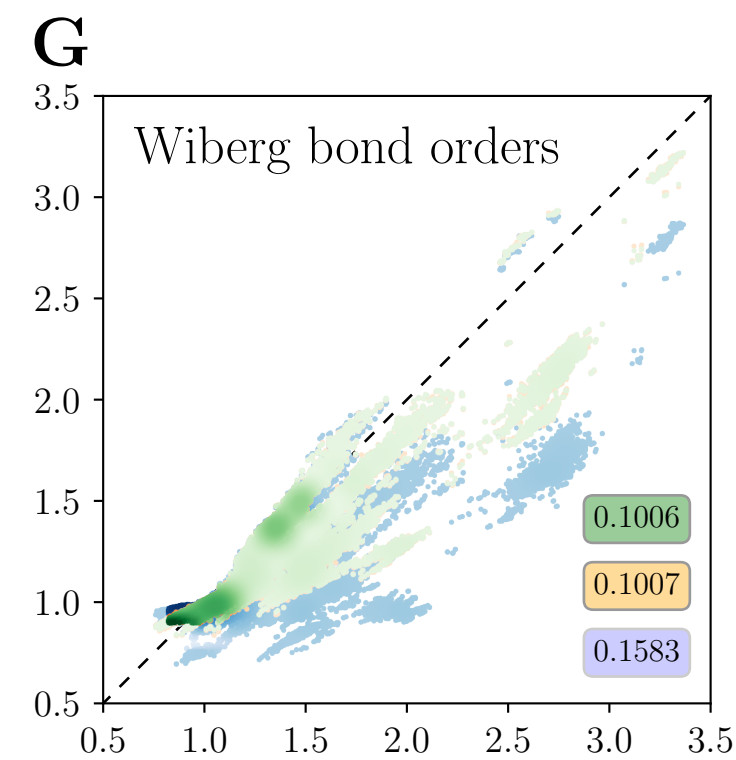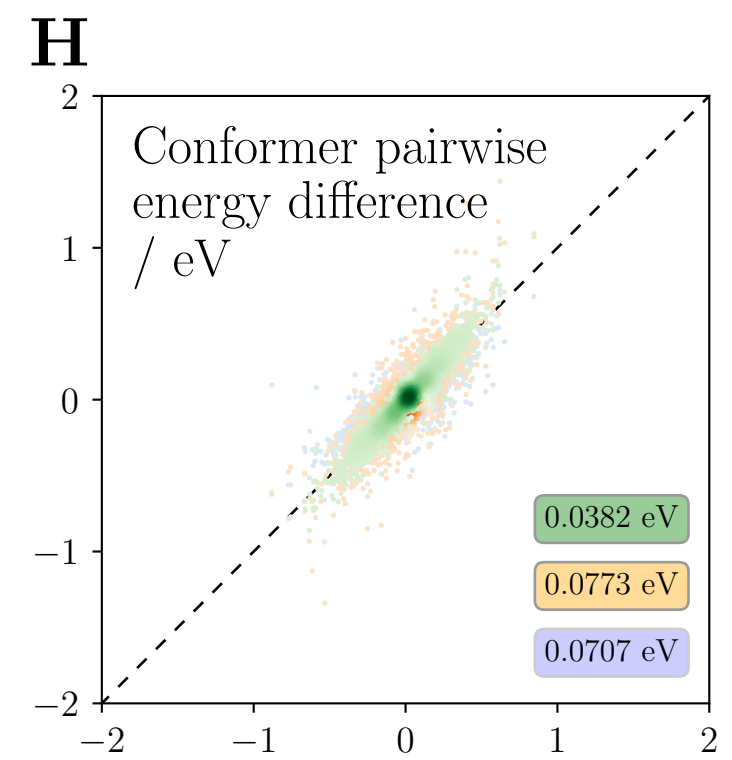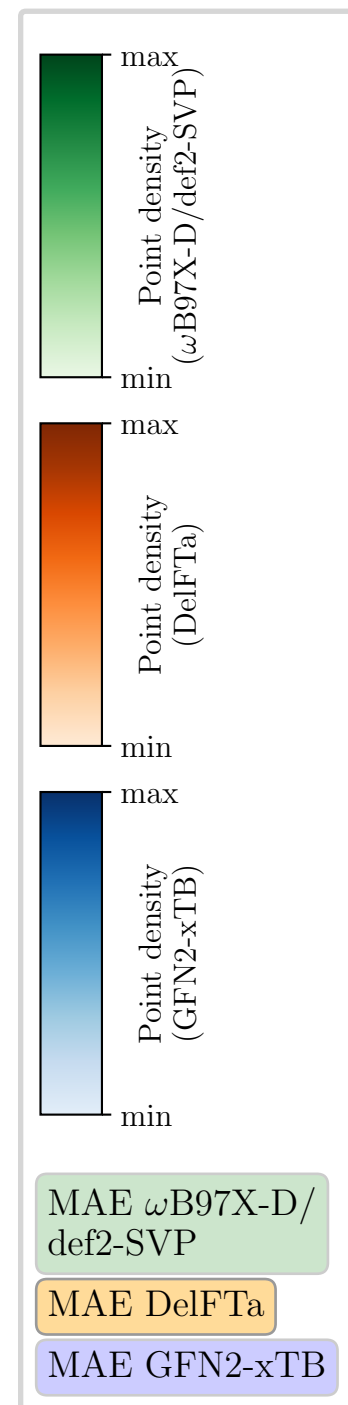

DFT reference ( $\omega$ B97X-D/def2-QZVP)

Supplement: d2cp00834c2.zip [file d2cp00834c2.zip]

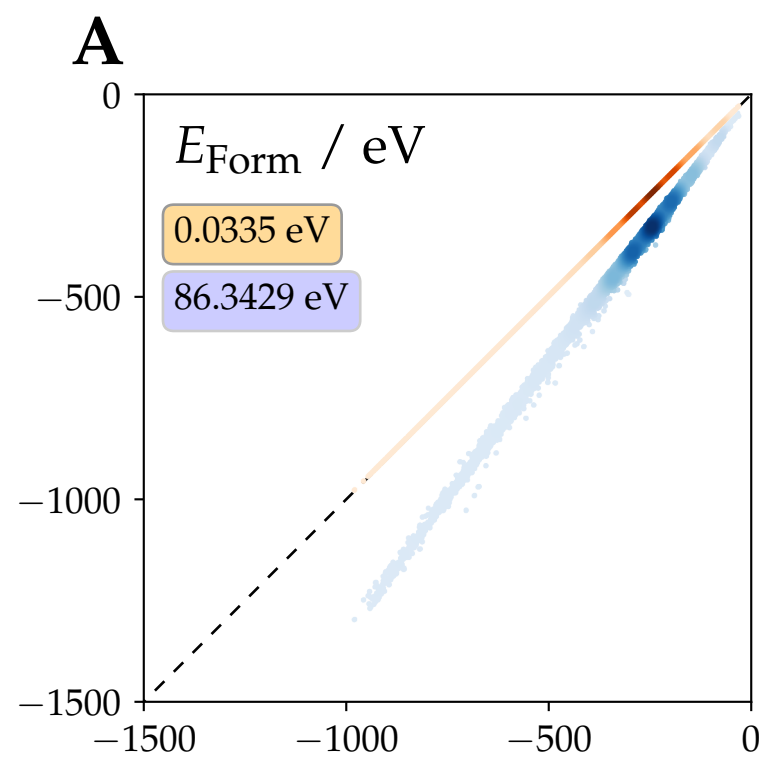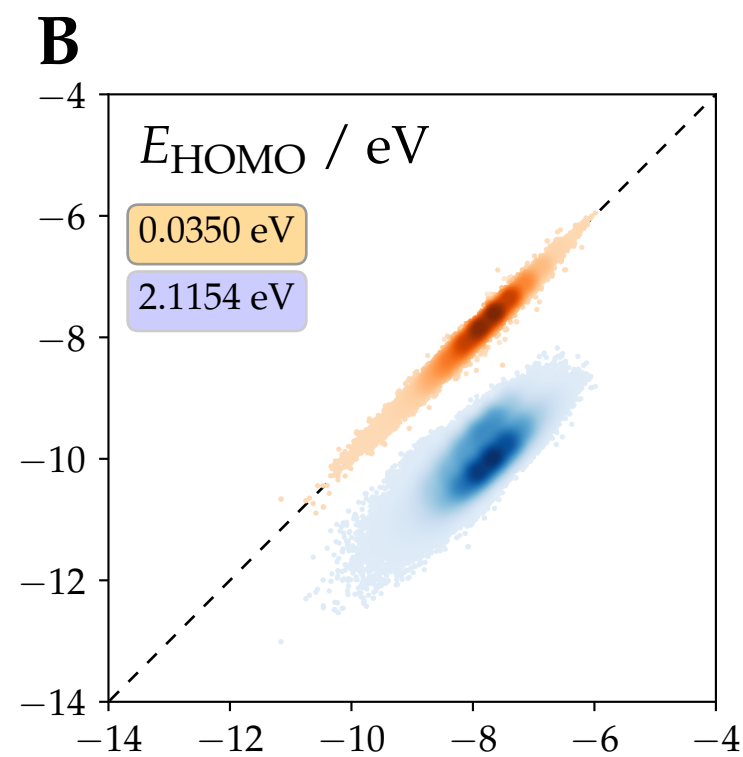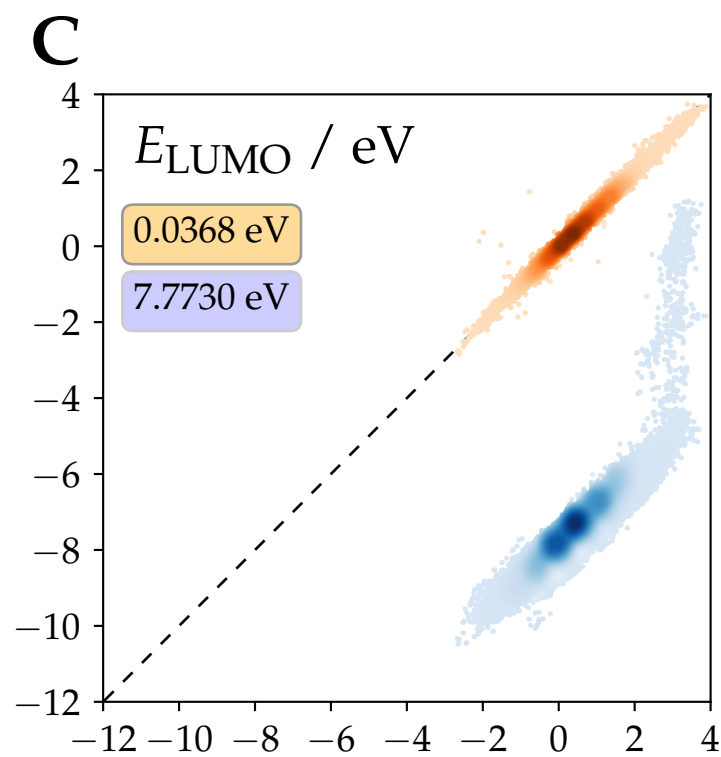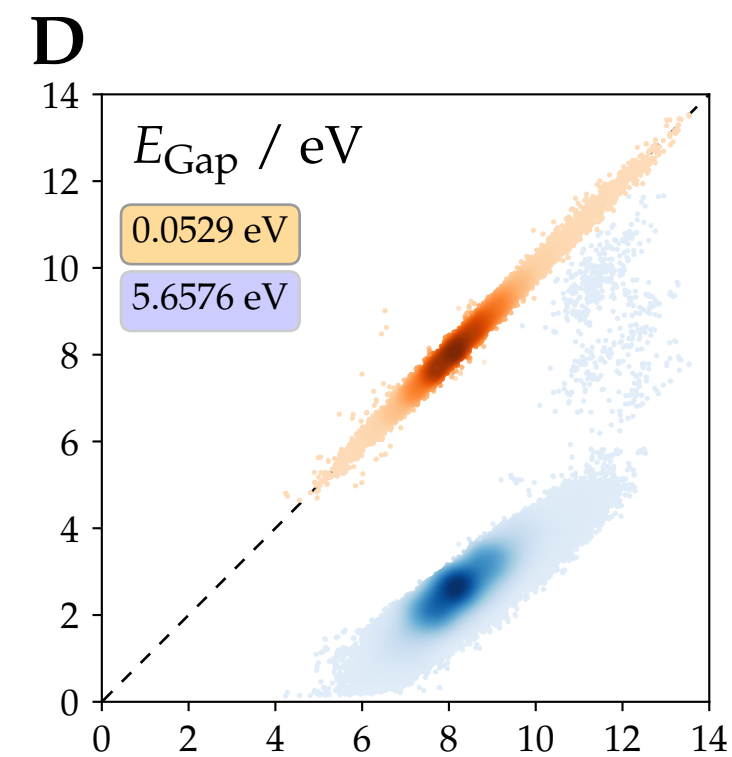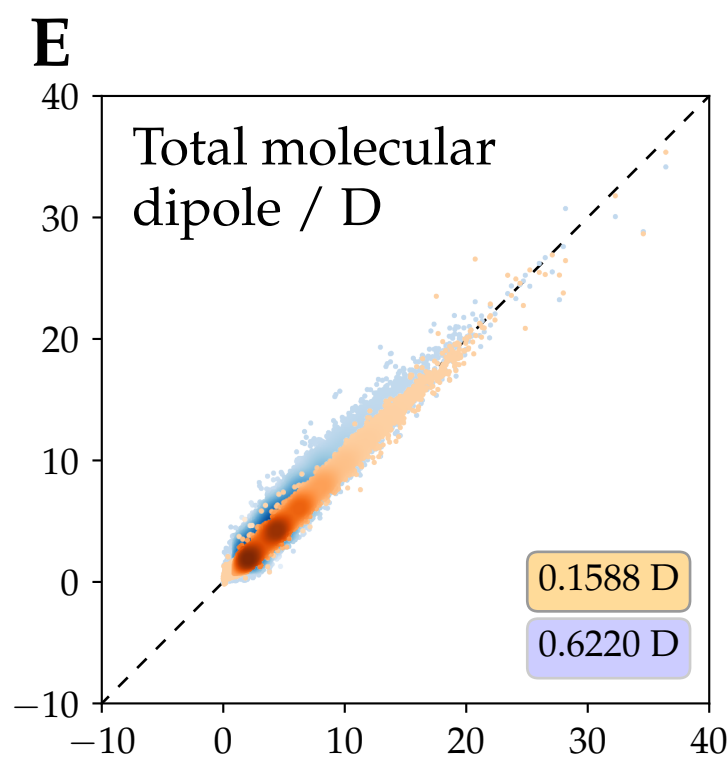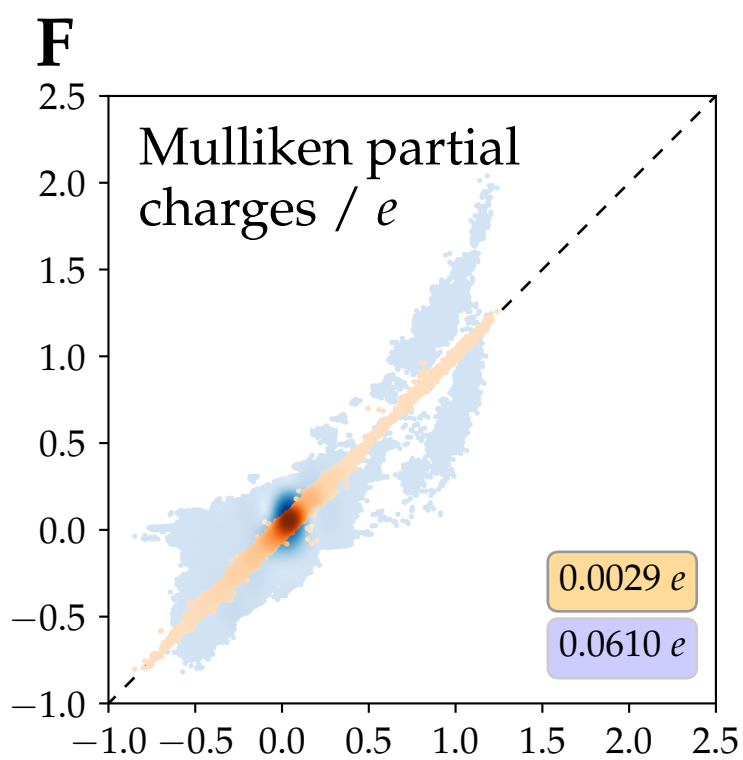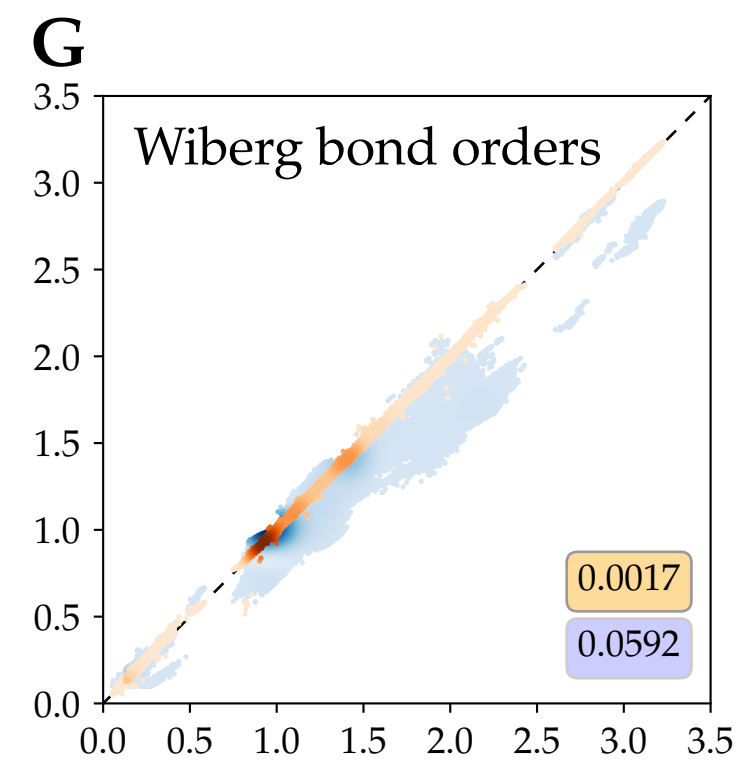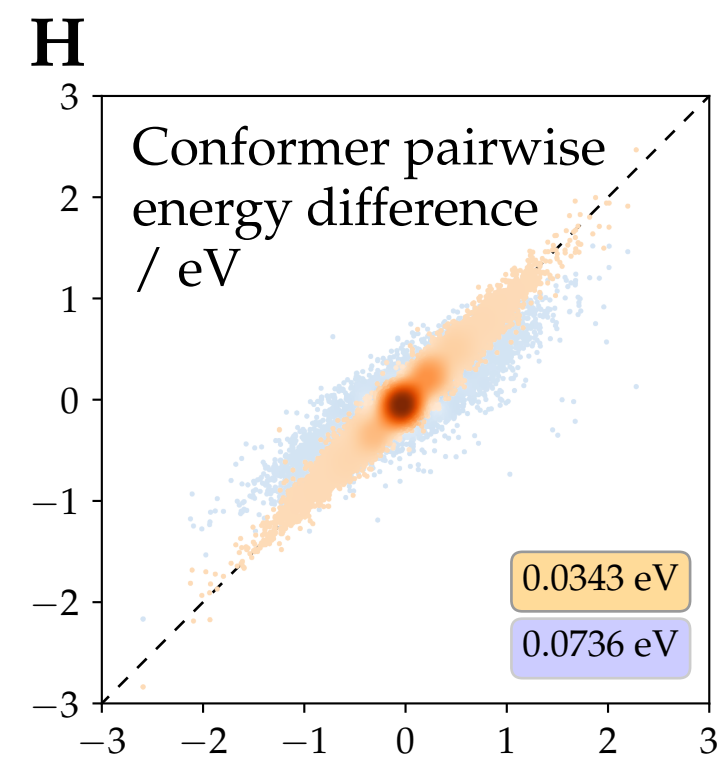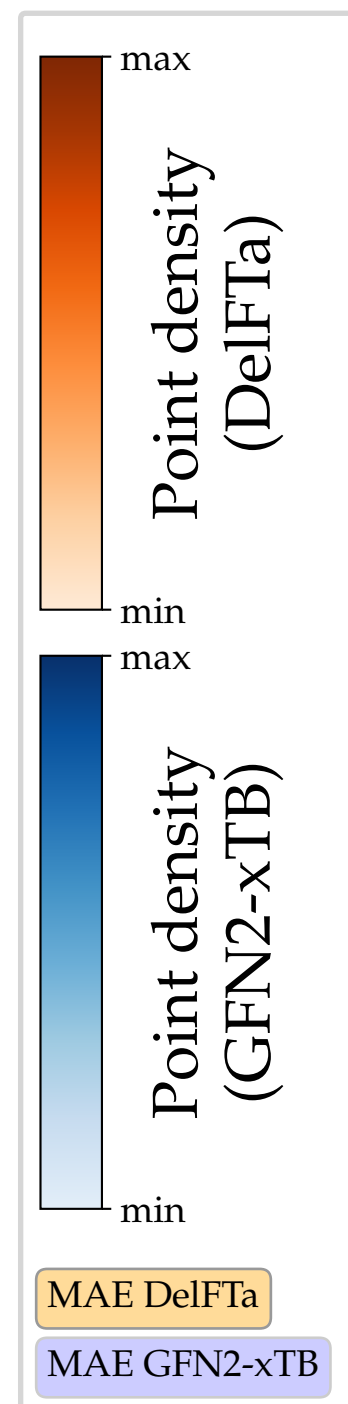DFT reference ( $\omega$ B97X-D/def2-SVP)

Supplement: d2cp00834c2.zip [file d2cp00834c2.zip]

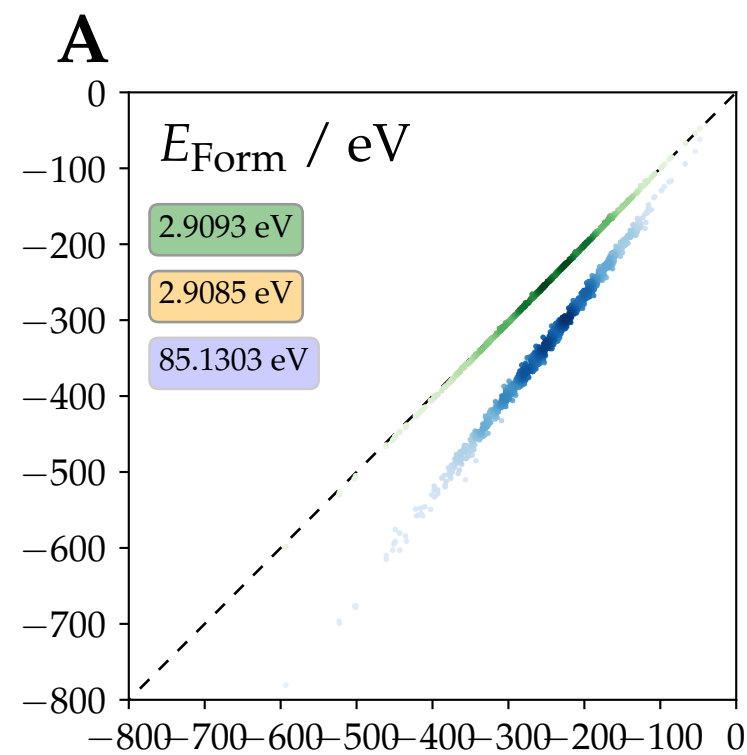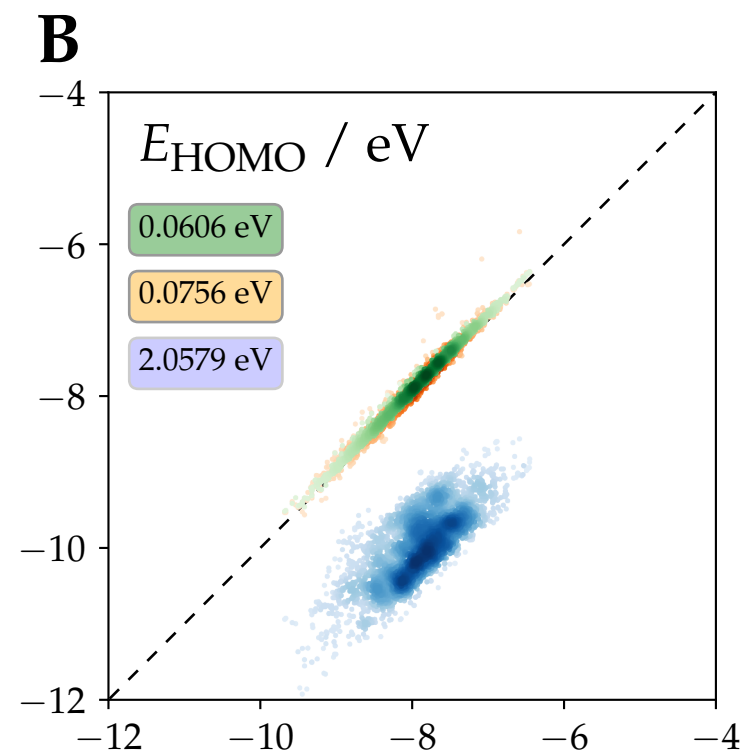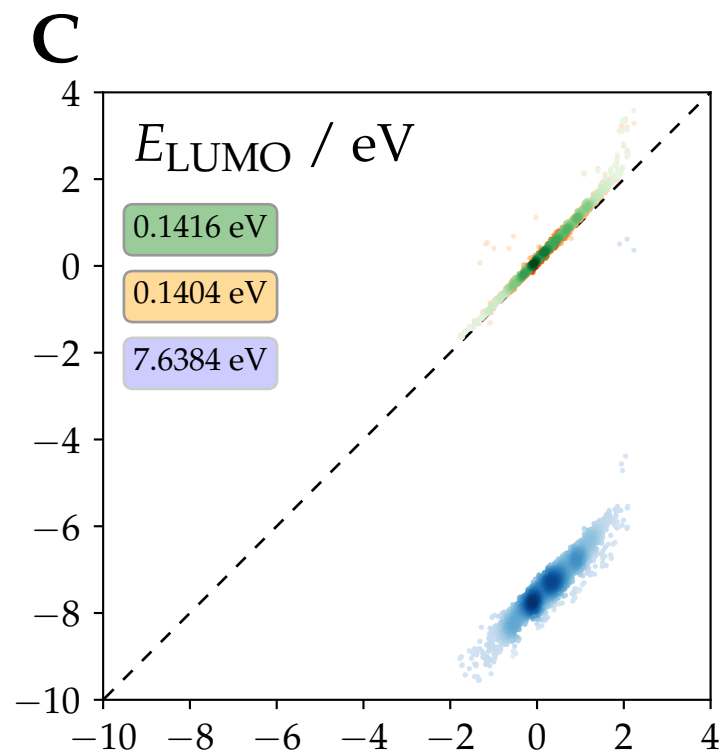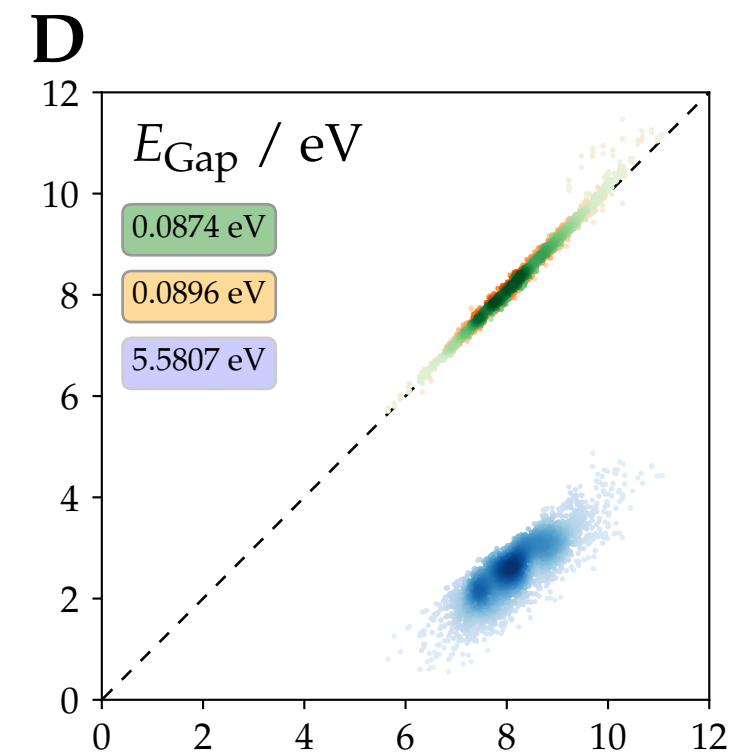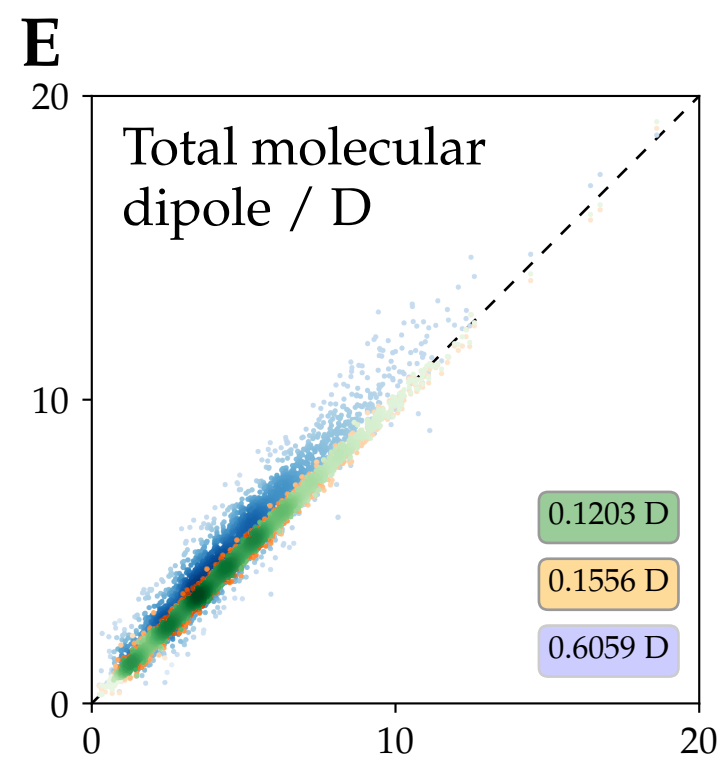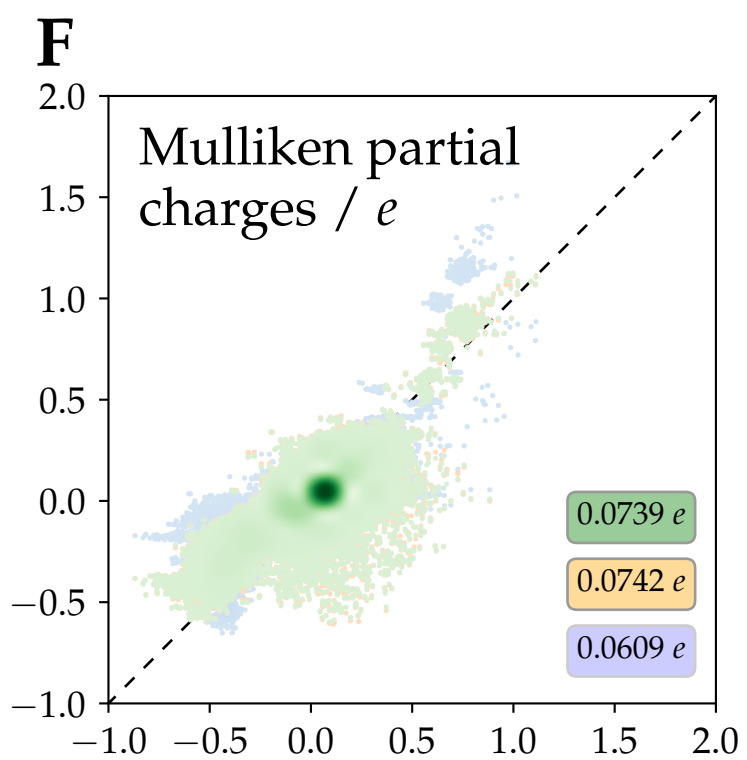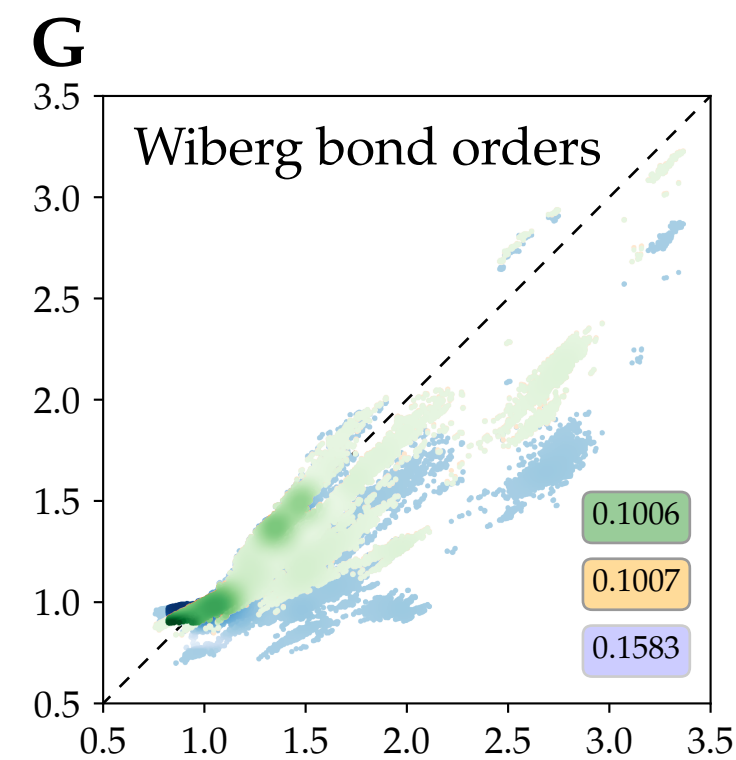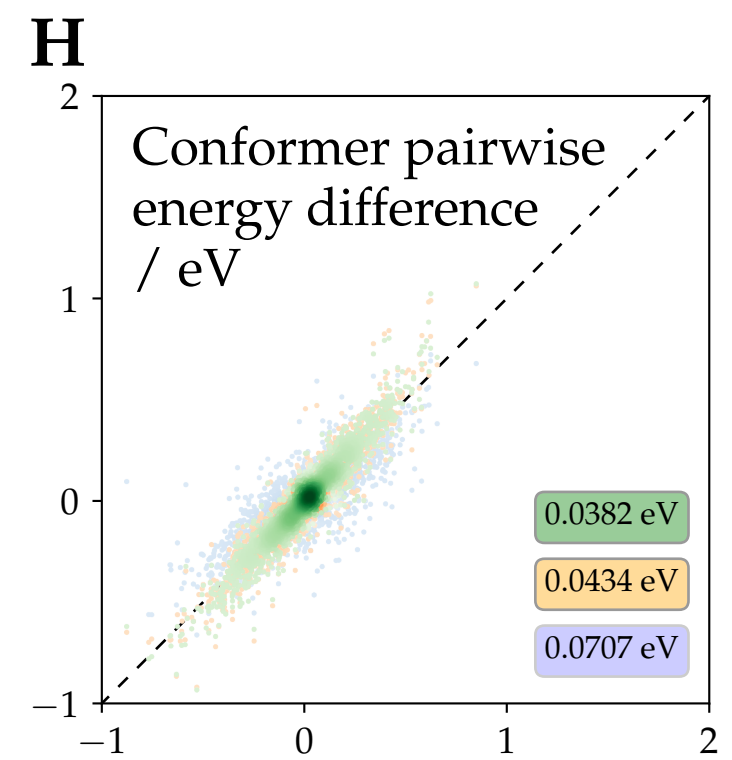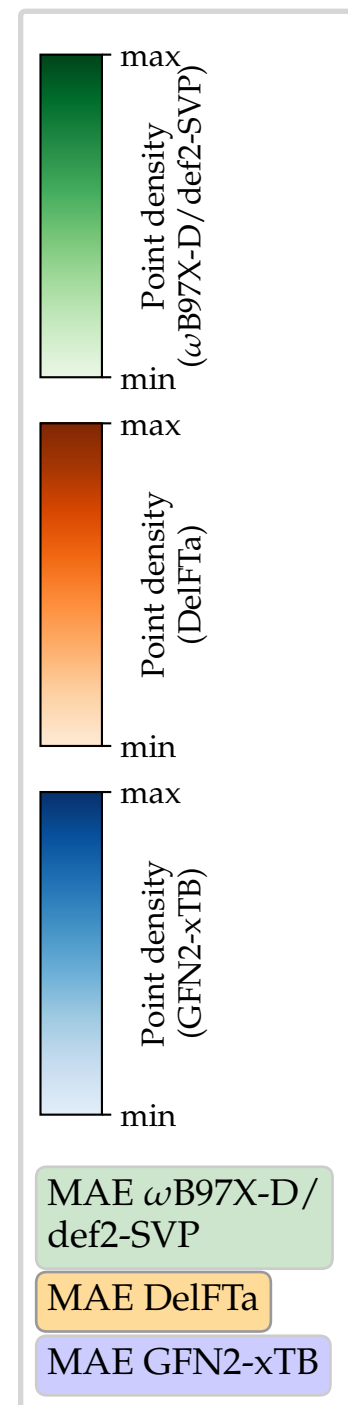

DFT reference ( $\omega$ B97X-D/def2-QZVP)

Supplement: d2cp00834c2.zip [file d2cp00834c2.zip]
